# Supplementary material
Source: PubMed Central journal article supplement (PMC8223728)

## Source Data - Extended Data Figure 2b

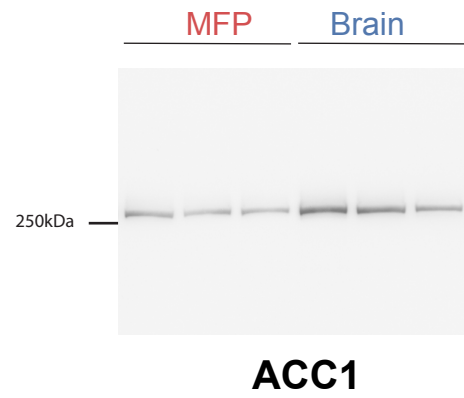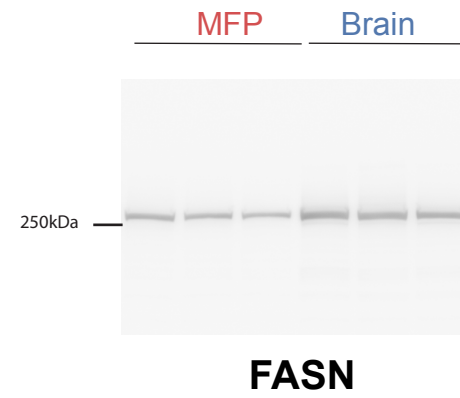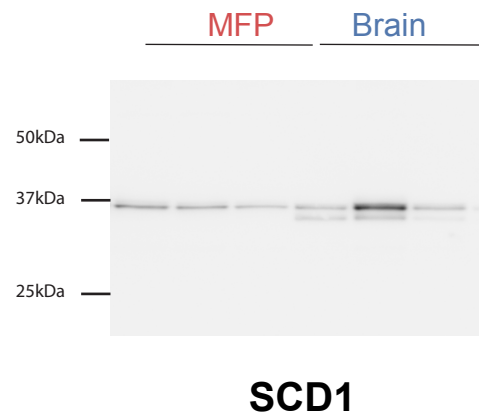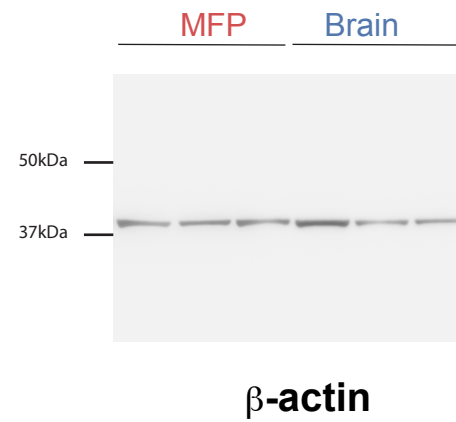

Supplement: NIHMS1681647-supplement-1681647_sourceData_ExtData_Fig2.pdf [file NIHMS1681647-supplement-1681647_sourceData_ExtData_Fig2.pdf]

# Source Data - Extended Data Figure 5 a,b

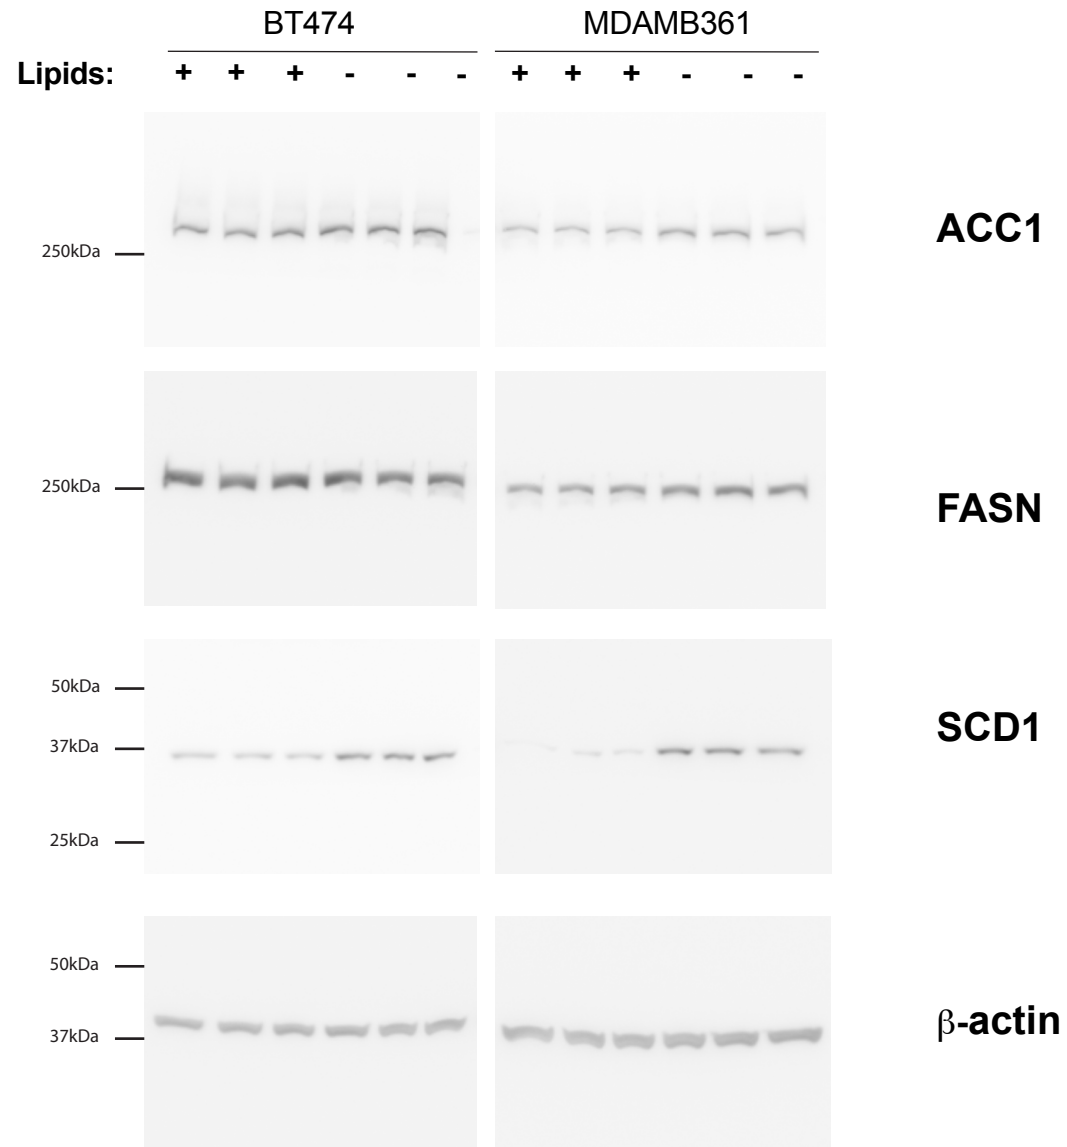

Supplement: NIHMS1681647-supplement-1681647_sourceData_ExtData_Fig5.pdf [file NIHMS1681647-supplement-1681647_sourceData_ExtData_Fig5.pdf]

Source Data - Extended Data Figure 6b, e

b. BT474

e. MDAMB361

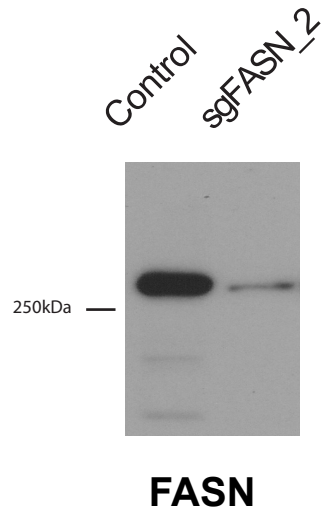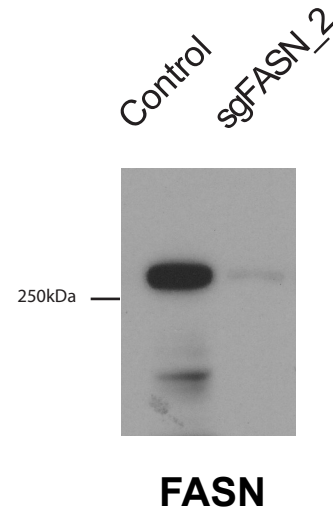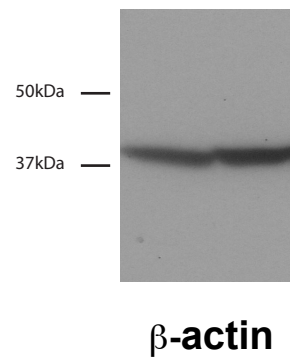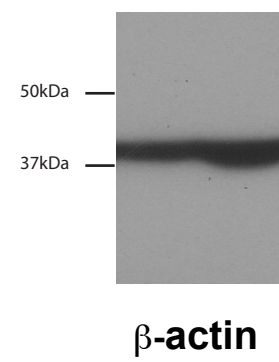

Supplement: NIHMS1681647-supplement-1681647_sourceData_ExtData_Fig6.pdf [file NIHMS1681647-supplement-1681647_sourceData_ExtData_Fig6.pdf]

# Source Data - Extended Data Figure 7a

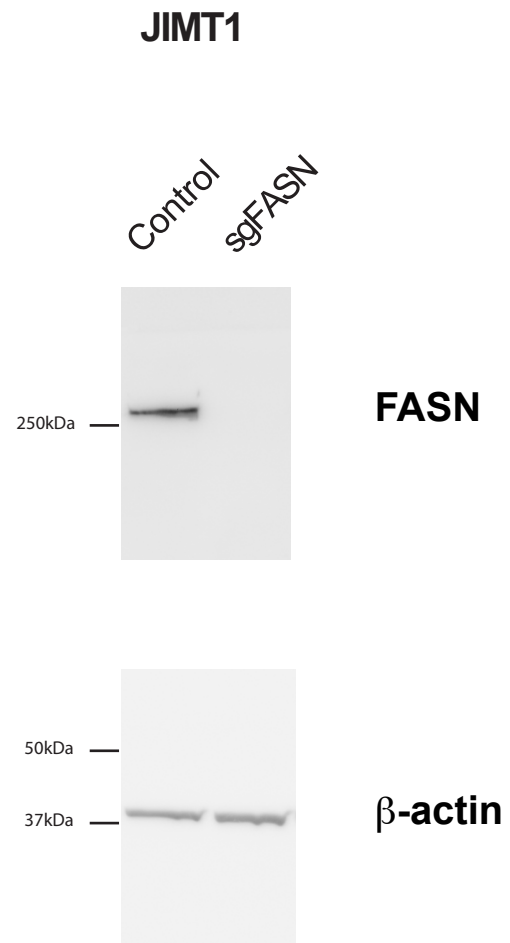

Supplement: NIHMS1681647-supplement-1681647_sourceData_ExtData_Fig7.pdf [file NIHMS1681647-supplement-1681647_sourceData_ExtData_Fig7.pdf]

**Figure 1b & Extended Data Figure 9c**

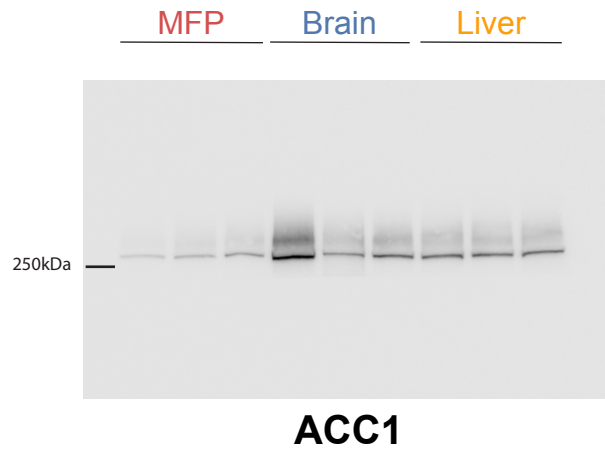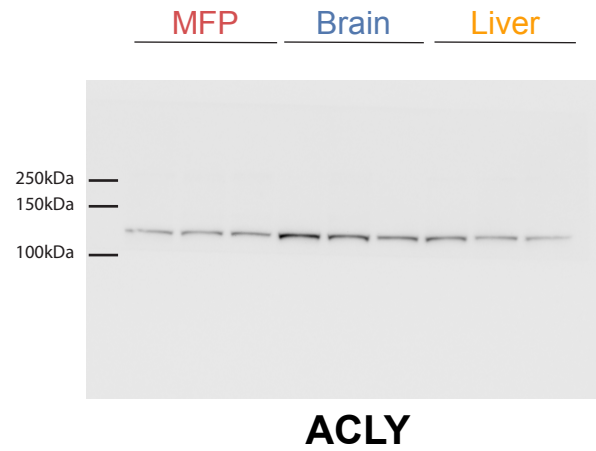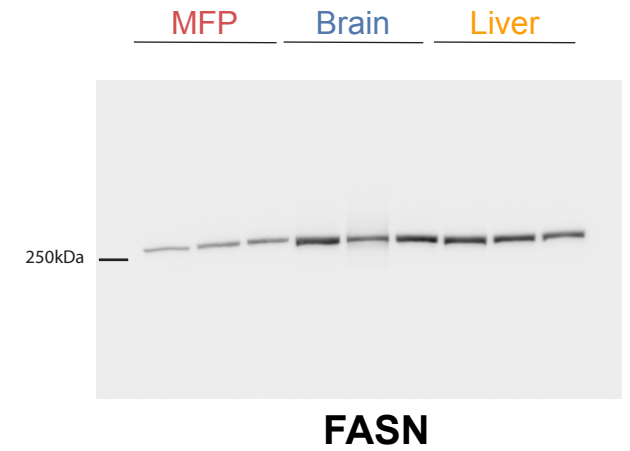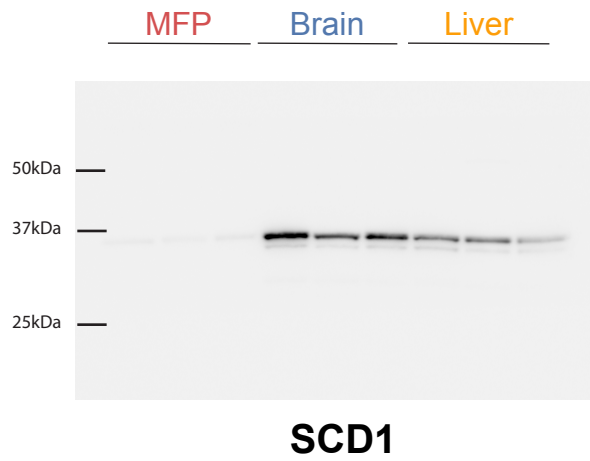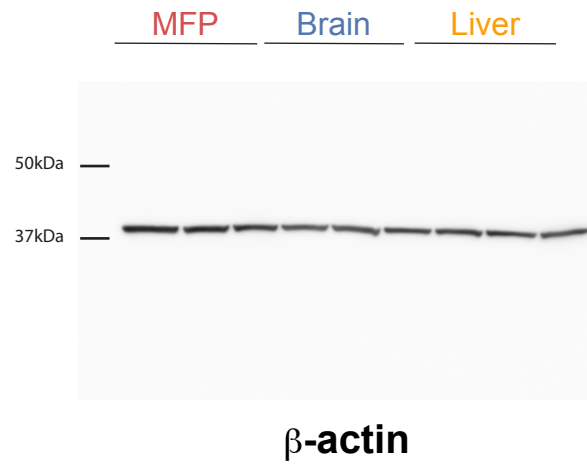

Supplement: NIHMS1681647-supplement-1681647_sourceData_Fig1.pdf [file NIHMS1681647-supplement-1681647_sourceData_Fig1.pdf]

Source Data - Figure 2e

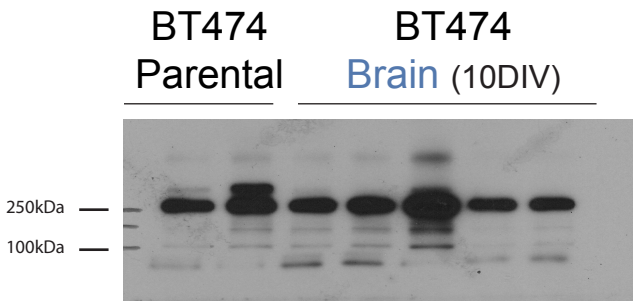

**FASN**

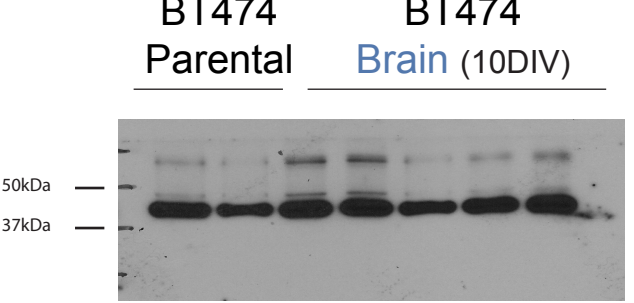

**β-actin**

Supplement: NIHMS1681647-supplement-1681647_sourceData_Fig2.pdf [file NIHMS1681647-supplement-1681647_sourceData_Fig2.pdf]

Source Data - Figure 5a, h

a. BT474

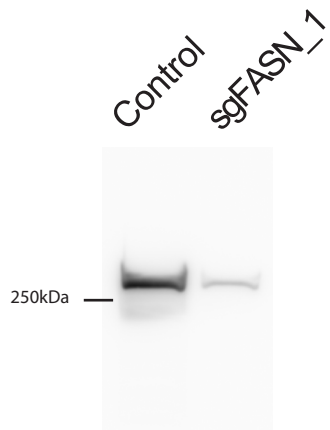

FASN

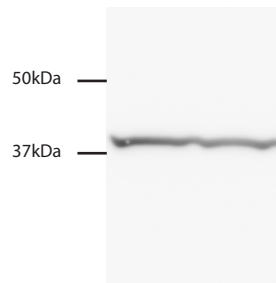

$\beta$ -actin

a. MDAMB361

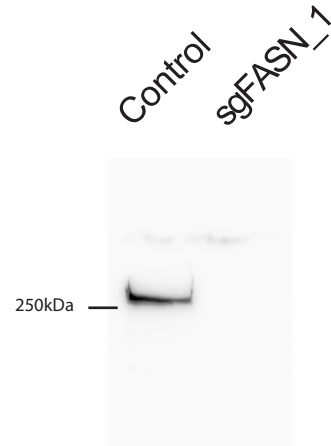

FASN

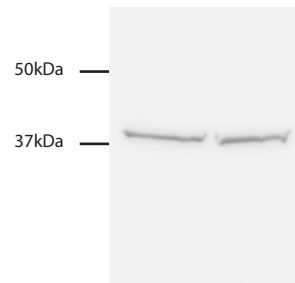

$\beta$ -actin

h. BT474

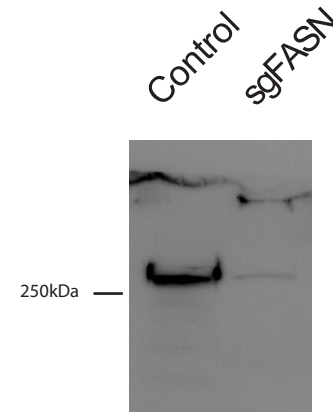

FASN

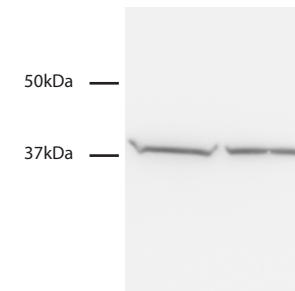

$\beta$ -actin

Supplement: NIHMS1681647-supplement-1681647_sourceData_Fig5.pdf [file NIHMS1681647-supplement-1681647_sourceData_Fig5.pdf]
